# Supplementary material
Source: PubMed Central journal article supplement (PMC9133462)
Supplement: mmc1.pdf [file mmc1.pdf]

**Cell Reports Medicine, Volume 3**

**Supplemental information**

**Distinct immune cell dynamics correlate  
with the immunogenicity and reactogenicity  
of SARS-CoV-2 mRNA vaccine**

**Tomohiro Takano, Miwa Morikawa, Yu Adachi, Kiyomi Kabasawa, Nicolas Sax, Saya Moriyama, Lin Sun, Masanori Isogawa, Aya Nishiyama, Taishi Onodera, Kazutaka Terahara, Keisuke Tonouchi, Masashi Nishimura, Kentaro Tomii, Kazuo Yamashita, Takayuki Matsumura, Masaharu Shinkai, and Yoshimasa Takahashi**

**Figure S1**

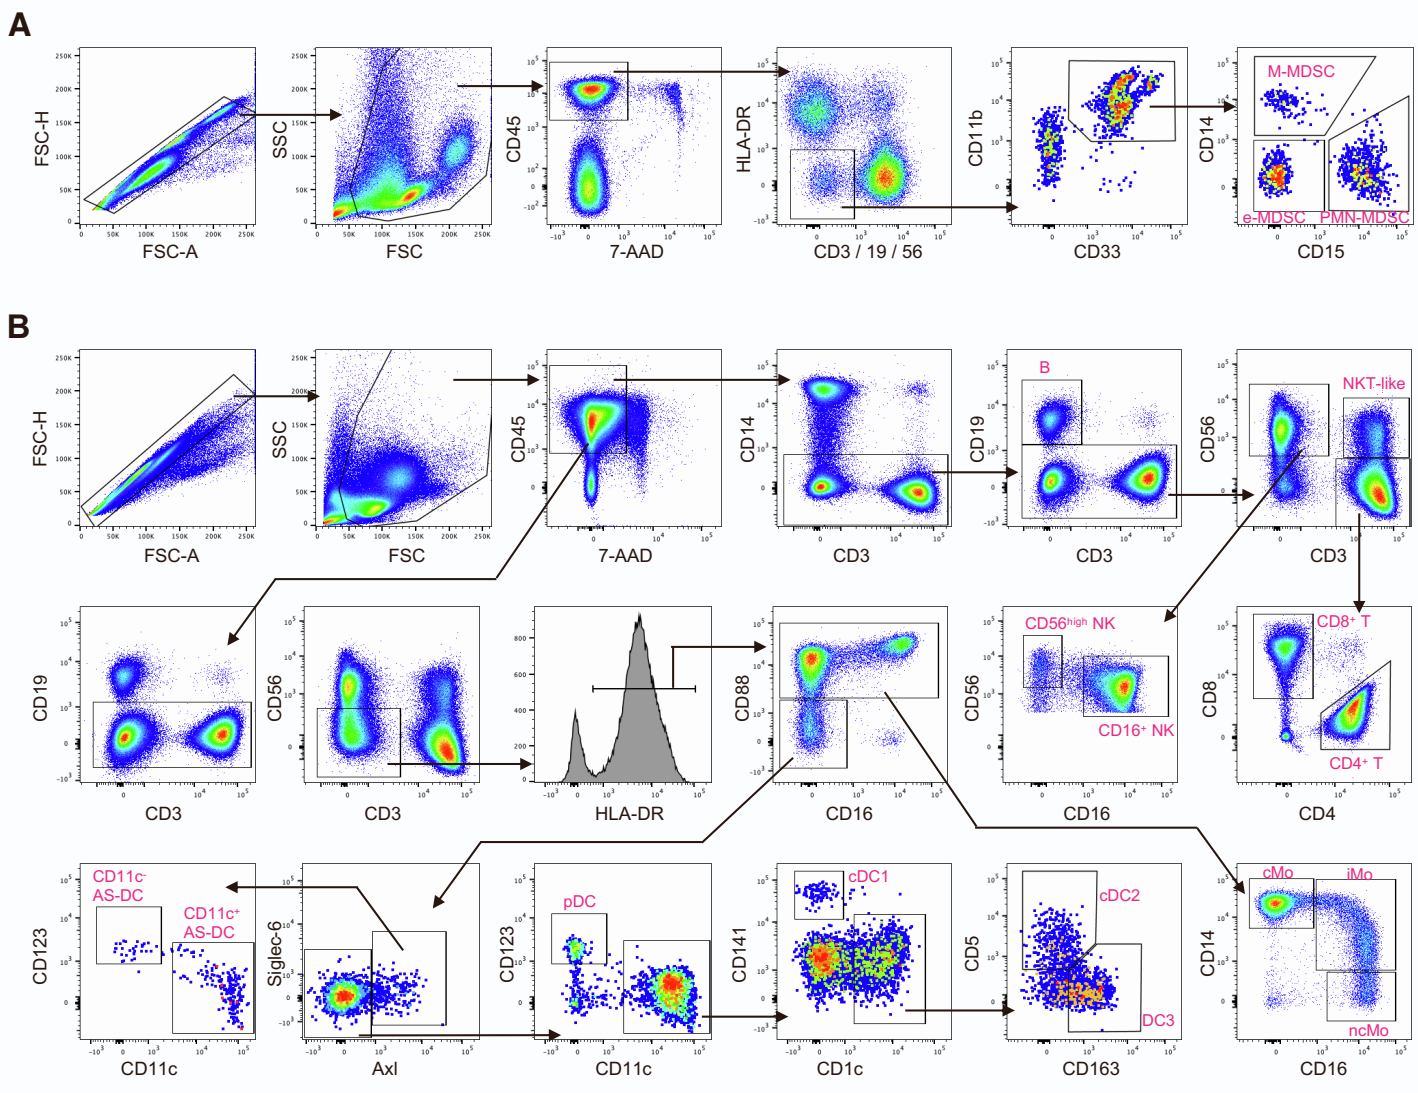

**Figure S1. Gating strategy of flow cytometric analysis, Related to Figure 1.**

(A) Gating strategy for identifying e-MDSCs, M-MDSCs, and PMN-MDSCs.

(B) Gating strategy for identifying B cells, CD4<sup>+</sup> T cells, CD8<sup>+</sup> T cells, CD16<sup>+</sup> NK cells, CD56<sup>high</sup> NK cells, NKT-like cells, classical monocytes, non-classical monocytes, intermediate monocytes, cDC1s, cDC2s, DC3s, CD11c<sup>+</sup> AS-DCs, CD11c<sup>-</sup> AS-DCs, and pDCs.

**Figure S2**

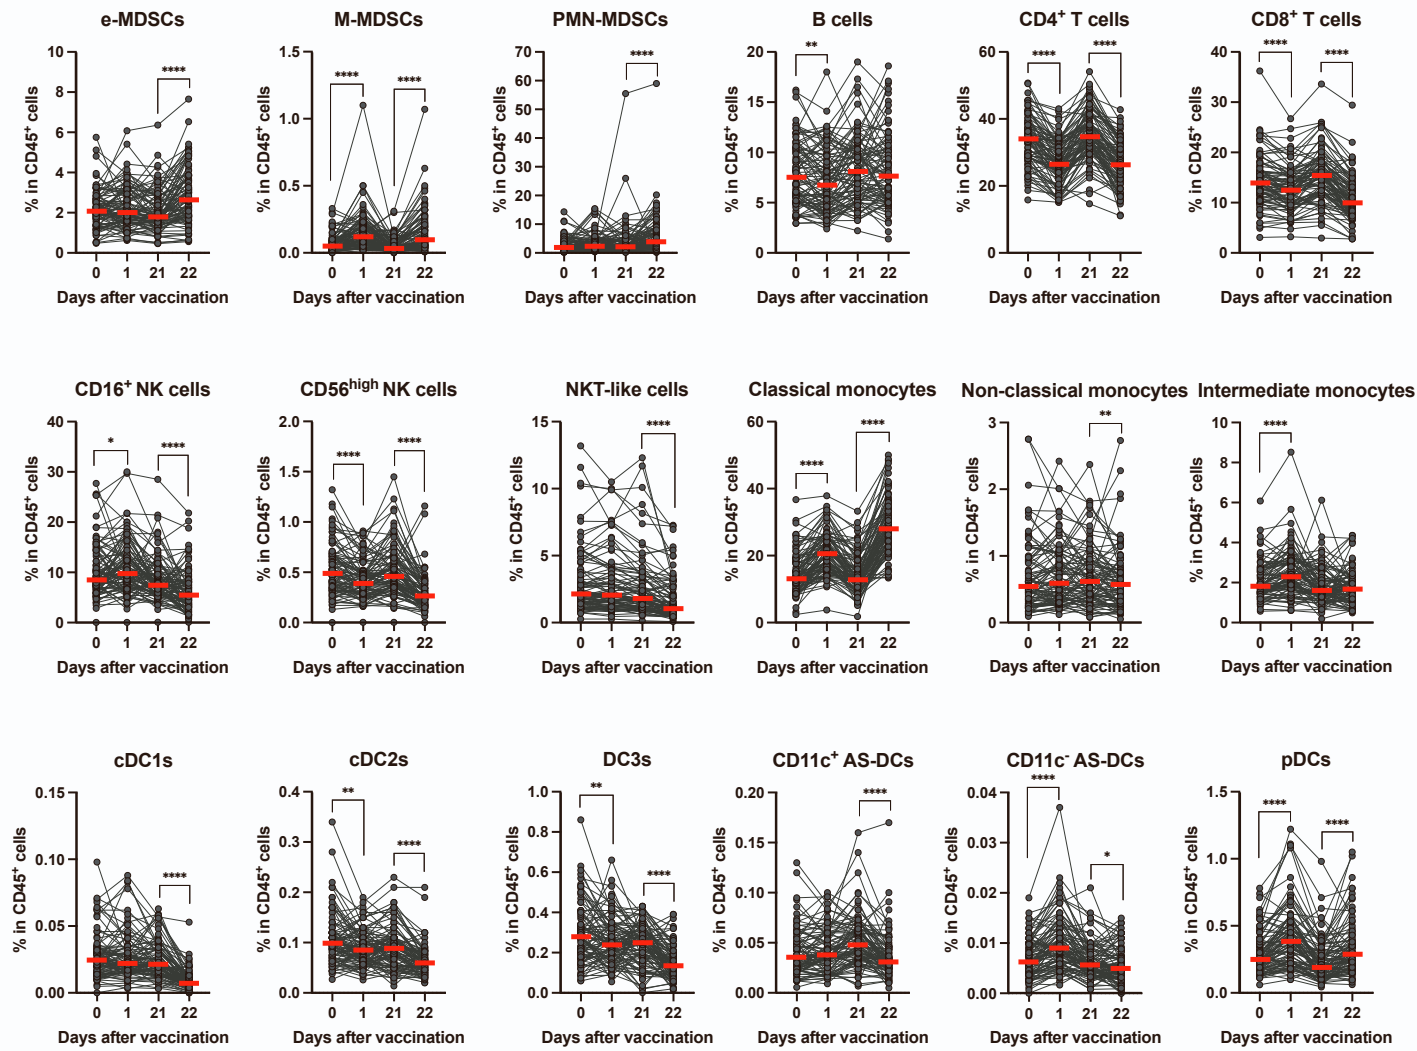

**Figure S2. Longitudinal analysis of 18 immune cells frequencies, Related to Figure 1.**

Longitudinal plots of cell frequencies at each time point; n = 92. Circles connected with a line represent data from the same individual. Bars represent the median and each dot represents the data for an individual participant. Statistical significance is indicated as follows; \*p < 0.05, \*\*p < 0.01, \*\*\*\*p < 0.0001, Wilcoxon test (d0 vs d1, and d21 vs d22).

Figure S3

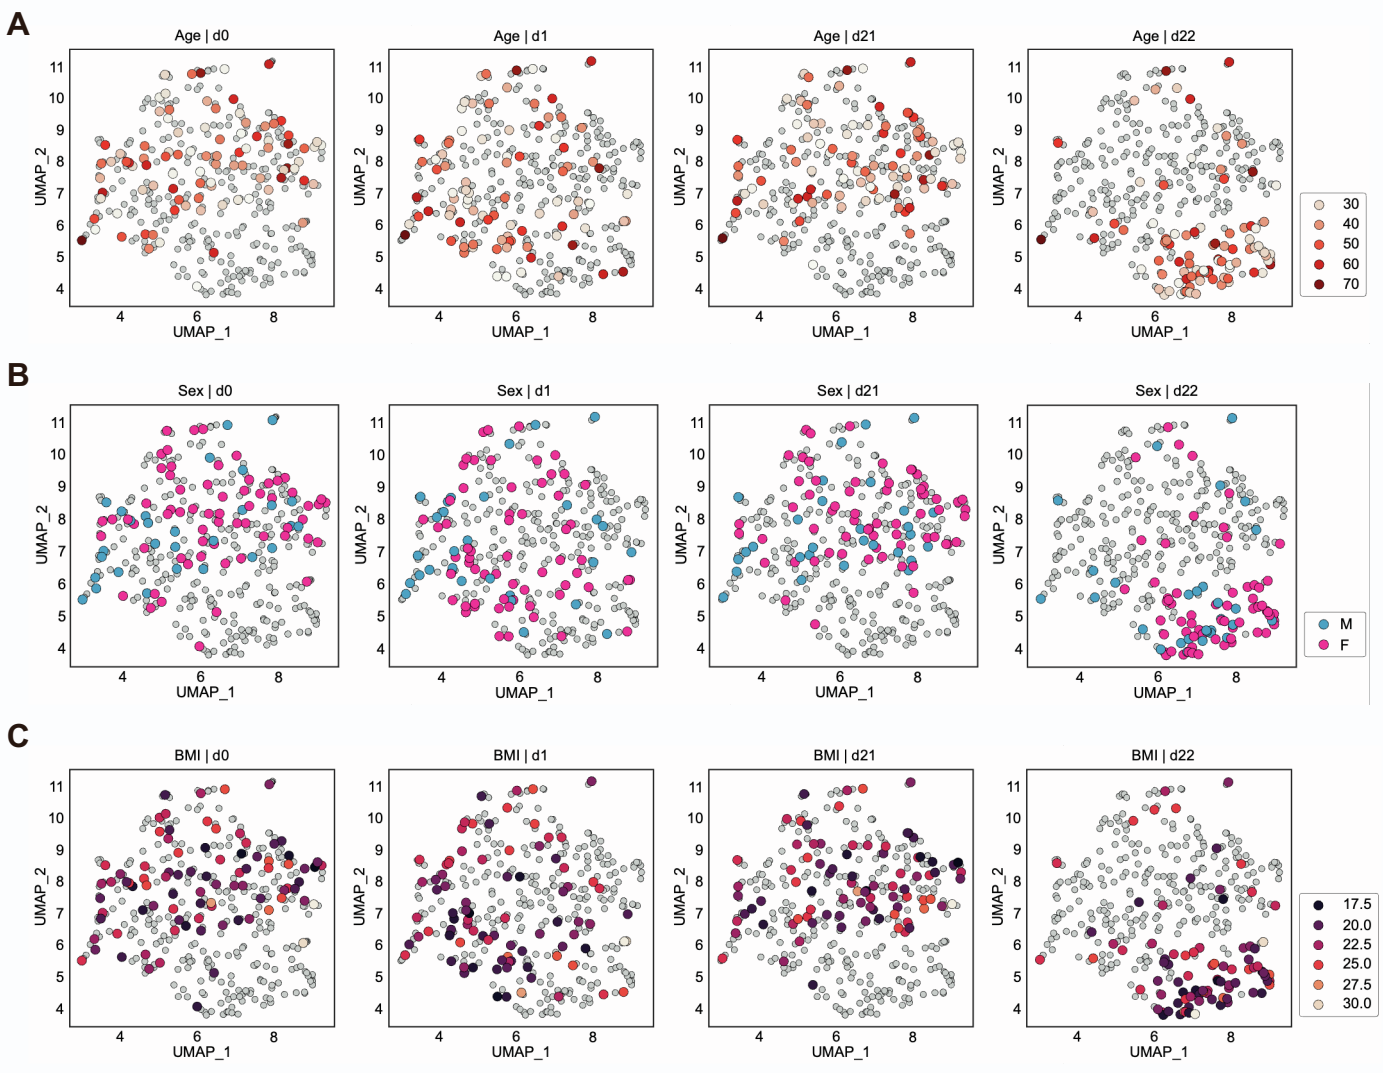

Figure S3. UMAP of 18 immune cell frequencies among four time points, Related to Figure 1.

(A–C) UMAPs of 18 immune cell frequencies shown in Fig. 1J. Each dot represents the data for an individual participant at each time point. n = 92. (A) Indicated points are colored by age at each time point. (B) Indicated points are colored by gender at each time point. (C) Indicated points are colored by BMI at each time point.

**Figure S4**

**A**

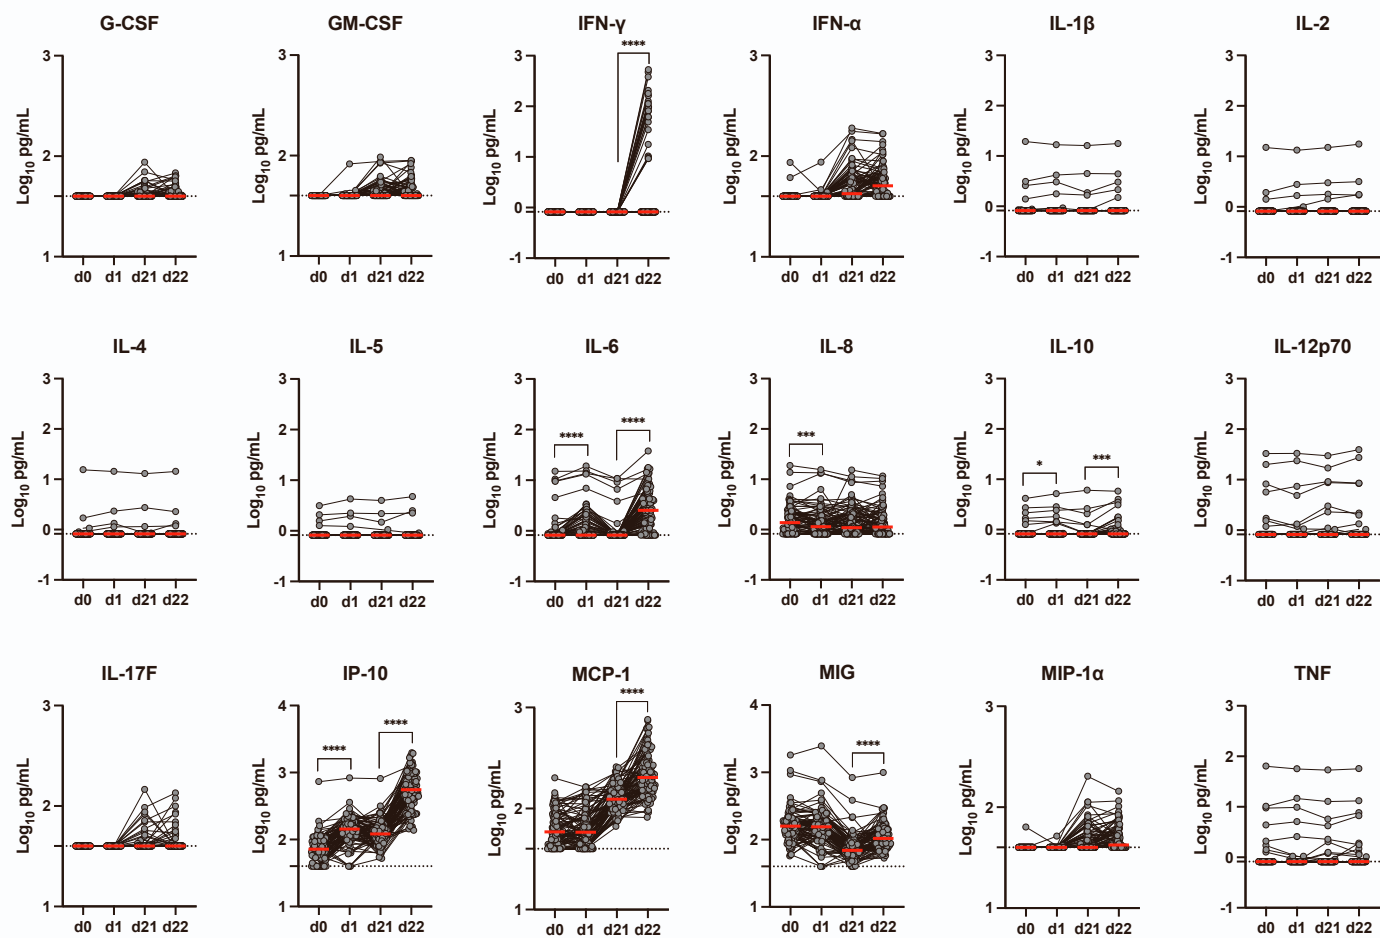

**B**

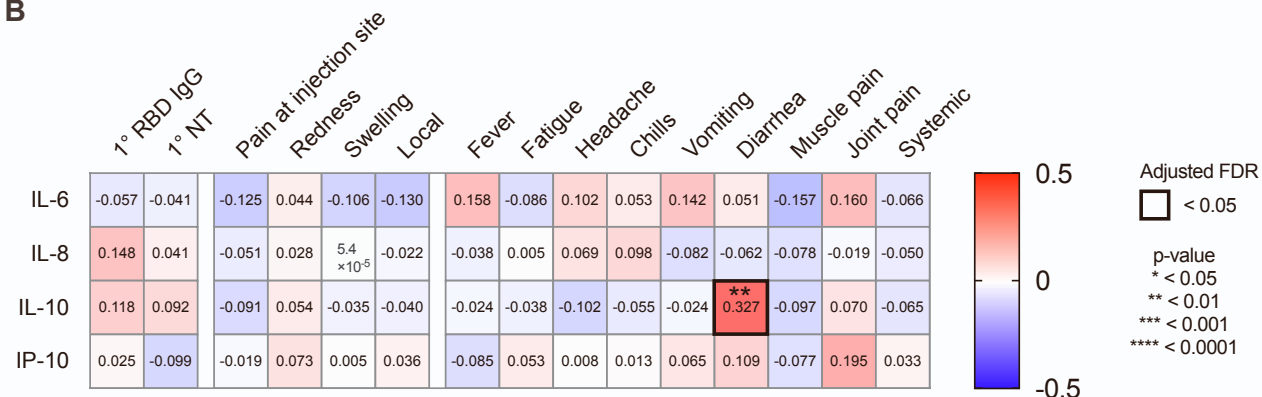

**Figure S4. Quantification of plasma cytokines/chemokines after the second vaccination, Related to Figures 2 and 3.**

(A) Concentration of cytokines in plasma. Circles connected with a line represent data from the same individual. n = 92. Bars represent the median and each dot represents the data for an individual participant. Dotted lines represent the detection limits.

(B) Heat map representation of Spearman correlation matrix between antibody responses / symptom severity scores after primary vaccination and cytokine/chemokine dynamics (d1–d0 post/pre ratios). n = 92.

Statistical significance is indicated as follows; \*p < 0.05, \*\*p < 0.01, \*\*\*p < 0.001, \*\*\*\*p < 0.0001, Wilcoxon test in (A) (d0 vs d1, and d21 vs d22), Spearman's rank-order coefficient test in (B). Spearman's r values are indicated in each cell in (B).

**Figure S5**

**A**

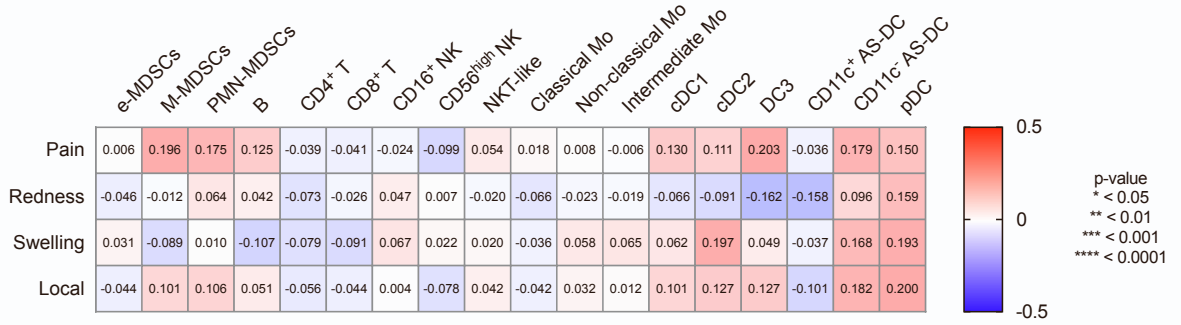

**B**

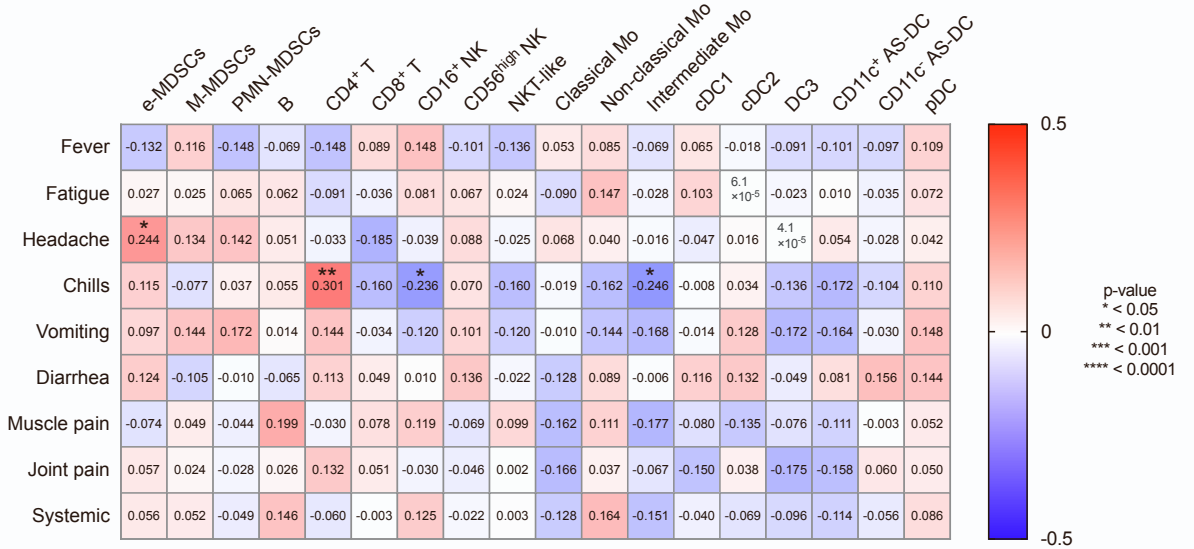

**Figure S5. Correlation between cellular dynamics and adverse events after the primary vaccination, Related to Figure 4.**

(A) Heat map representation of Spearman correlation matrixes between local symptom severity scores (primary vaccination) and cell dynamics (d1–d0 post/pre ratios). n = 92.

(B) Heat map representations of Spearman correlation matrix between systemic symptom severity scores (primary vaccination) and cell dynamics (d1–d0 post/pre ratios). n = 92. Statistical significance is indicated as follows; \*p < 0.05, \*\*p < 0.01, Spearman's rank-order coefficient test. Spearman's r values are indicated in each cell.

**Figure S6**

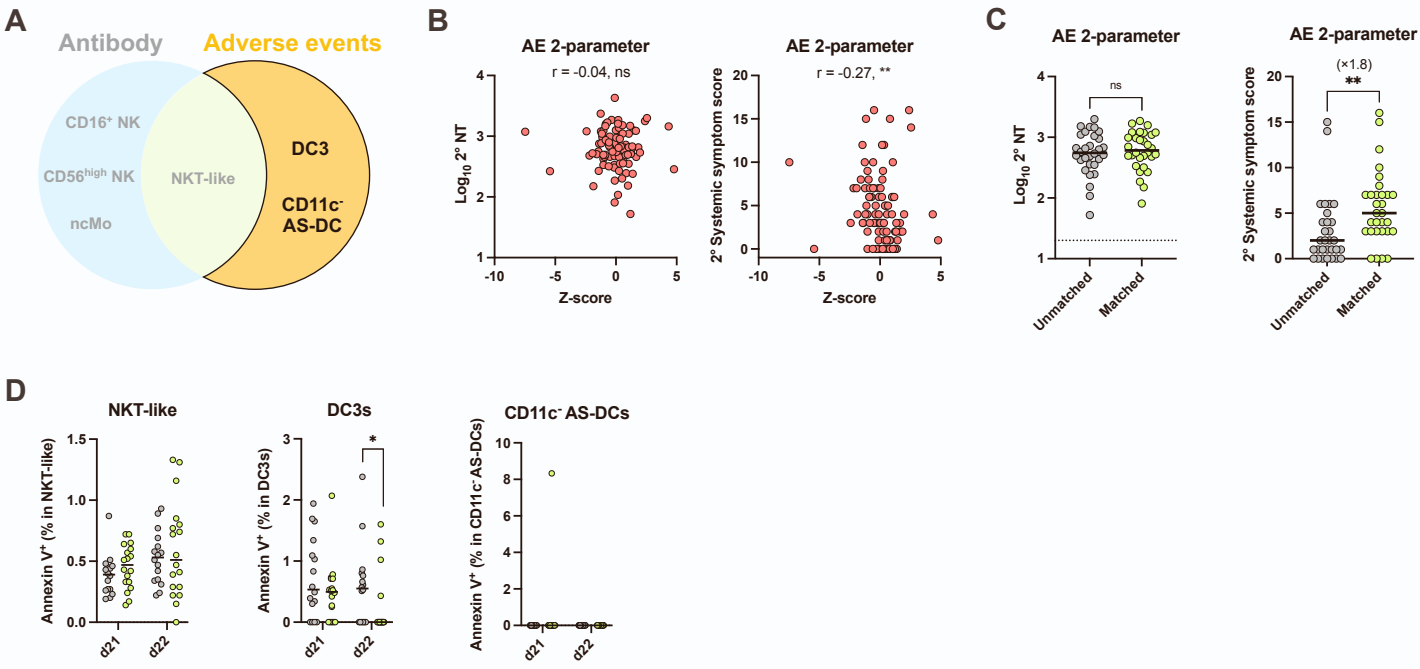

**Figure S6. Immune cell dynamics classify a subgroup of vaccinees with severe adverse events, Related to Figure 5.**

(A) Scheme of the 2-parameter model specific to adverse events.

(B) Z-score was calculated based on two parameters (i.e., the post/pre ratios of DC3s and CD11c<sup>+</sup> AS-DCs). Correlation of Z-score and NT titers at day 47–51 and systemic symptom severity scores.  $n = 92$ .

(C) Participants were stratified into matched and unmatched group for 2-parameter model specific to adverse events. NT titers and systemic symptom severity scores compared between matched group and unmatched group. Matched group,  $n = 30$ ; unmatched group,  $n = 30$ .

(D) Binding of Annexin V at day 21 and day 22 were compared between AE-related matched group and unmatched group. Matched group,  $n = 18$ ; unmatched group,  $n = 16$  (AE 3-parameter).

Statistical significance is indicated as follows; **\*\*** $p < 0.01$ , Mann-Whitney test in (C and D), Spearman's rank-order coefficient test in (B). Spearman's  $r$  values are indicated above the plots in (B).

**Figure S7**

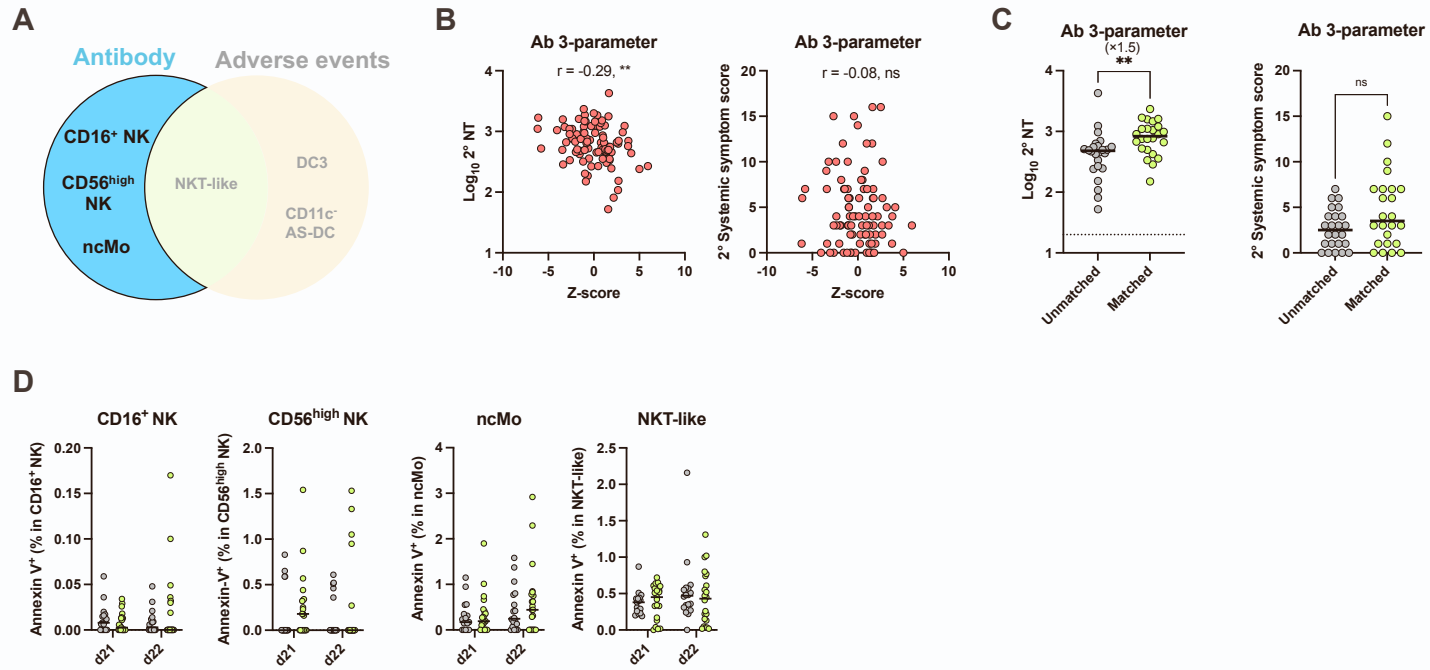

**Figure S7. Immune cell dynamics classify a subgroup of vaccinees with high neutralizing antibody responses, Related to Figure 6.**

(A) Scheme of the 3-parameter model specific to antibody responses.

(B) Z-score was calculated based on three parameters (i.e., the post/pre ratios of CD16<sup>+</sup> NK, CD56<sup>high</sup> NK, and ncMo). Correlation of Z-score and NT titers at day 47–51 and systemic symptom severity scores.  $n = 92$ .

(C) Participants stratified into matched and unmatched group for 3-parameter model specific to antibody responses. NT titers and systemic symptom severity scores compared between matched group and unmatched group. Matched group,  $n = 24$ ; unmatched group,  $n = 24$ .

(D) Binding of Annexin V at day 21 and day 22 were compared between Ab-related matched group and unmatched group. Matched group,  $n = 21$  (d21),  $n = 22$  (d22); unmatched group,  $n = 17$  (d21),  $n = 18$  (d22) (Ab 4-parameter).

Statistical significance is indicated as follows;  $**p < 0.01$ , Mann-Whitney test in (C and D), Spearman's rank-order coefficient test in (B). Spearman's  $r$  values are indicated above the plots in (B).



**Table S1. Criteria of symptom severity score, Related to Figure 1.**

| <b>Local Symptom</b> | <b>Grade 1</b>                | <b>Grade 2</b>                  | <b>Grade 3</b>          | <b>Grade 4</b>                     |
|----------------------|-------------------------------|---------------------------------|-------------------------|------------------------------------|
| Pain                 | No interference with activity | Some interference with activity | Prevents daily activity | ER visit or hospitalization        |
| Redness              | 2.5 – 5 cm                    | 5.1 – 10 cm                     | > 10 cm                 | Necrosis or exfoliative dermatitis |
| Swelling             | 2.5 – 5 cm                    | 5.1 – 10 cm                     | > 10 cm                 | Necrosis                           |

| <b>Systemic Symptom</b> | <b>Grade 1</b>                | <b>Grade 2</b>                  | <b>Grade 3</b>                    | <b>Grade 4</b>              |
|-------------------------|-------------------------------|---------------------------------|-----------------------------------|-----------------------------|
| Fever                   | 38.0 – 38.4 °C                | 38.5 – 38.9 °C                  | 39.0 – 40 °C                      | > 40 °C                     |
| Fatigue                 | No interference with activity | Some interference with activity | Prevents daily activity           | ER visit or hospitalization |
| Headache                | No interference with activity | Some interference with activity | Prevents daily activity           | ER visit or hospitalization |
| Chills                  | No interference with activity | Some interference with activity | Prevents daily activity           | ER visit or hospitalization |
| Vomiting                | 1 – 2 episodes / 24 hours     | > 2 episodes / 24 hours         | Requires intravenous hydration    | ER visit or hospitalization |
| Diarrhea                | 2 – 3 loose stools / 24 hours | 4 – 5 loose stools / 24 hours   | 6 or more loose stools / 24 hours | ER visit or hospitalization |
| Muscle pain             | No interference with activity | Some interference with activity | Prevents daily activity           | ER visit or hospitalization |
| Joint pain              | No interference with activity | Some interference with activity | Prevents daily activity           | ER visit or hospitalization |

**Table S2. Immune cell phenotypes, Related to Figure 1.**

| <b>Cell type</b>         | <b>Phenotype</b>                                                                                                                                                                                                                                                                        |
|--------------------------|-----------------------------------------------------------------------------------------------------------------------------------------------------------------------------------------------------------------------------------------------------------------------------------------|
| e-MDSCs                  | CD45 <sup>+</sup> CD3 <sup>-</sup> CD19 <sup>-</sup> CD56 <sup>-</sup> HLA-DR <sup>-</sup> CD11b <sup>+</sup> CD33 <sup>+</sup> CD14 <sup>-</sup> CD15 <sup>-</sup>                                                                                                                     |
| M-MDSCs                  | CD45 <sup>+</sup> CD3 <sup>-</sup> CD19 <sup>-</sup> CD56 <sup>-</sup> HLA-DR <sup>-</sup> CD11b <sup>+</sup> CD33 <sup>+</sup> CD14 <sup>+</sup> CD15 <sup>-</sup>                                                                                                                     |
| PMN-MDSCs                | CD45 <sup>+</sup> CD3 <sup>-</sup> CD19 <sup>-</sup> CD56 <sup>-</sup> HLA-DR <sup>-</sup> CD11b <sup>+</sup> CD33 <sup>+</sup> CD14 <sup>-</sup> CD15 <sup>+</sup>                                                                                                                     |
| B cells                  | CD45 <sup>+</sup> CD14 <sup>-</sup> CD3 <sup>-</sup> CD19 <sup>+</sup>                                                                                                                                                                                                                  |
| CD4 <sup>+</sup> T cells | CD45 <sup>+</sup> CD3 <sup>+</sup> CD4 <sup>+</sup>                                                                                                                                                                                                                                     |
| CD8 <sup>+</sup> T cells | CD45 <sup>+</sup> CD3 <sup>+</sup> CD8 <sup>+</sup>                                                                                                                                                                                                                                     |
| CD16 <sup>+</sup> NK     | CD45 <sup>+</sup> CD14 <sup>-</sup> CD3 <sup>-</sup> CD19 <sup>-</sup> CD56 <sup>+</sup> CD16 <sup>+</sup>                                                                                                                                                                              |
| CD56 <sup>high</sup> NK  | CD45 <sup>+</sup> CD14 <sup>-</sup> CD3 <sup>-</sup> CD19 <sup>-</sup> CD56 <sup>hi</sup>                                                                                                                                                                                               |
| NKT-like                 | CD45 <sup>+</sup> CD14 <sup>-</sup> CD3 <sup>+</sup> CD19 <sup>-</sup> CD56 <sup>hi</sup>                                                                                                                                                                                               |
| Classical monocyte       | CD45 <sup>+</sup> CD3 <sup>-</sup> CD19 <sup>-</sup> CD56 <sup>-</sup> HLA-DR <sup>+</sup> CD88 <sup>+</sup> CD14 <sup>+</sup> CD16 <sup>-</sup>                                                                                                                                        |
| Non-classical monocyte   | CD45 <sup>+</sup> CD3 <sup>-</sup> CD19 <sup>-</sup> CD56 <sup>-</sup> HLA-DR <sup>+</sup> CD88 <sup>+</sup> CD14 <sup>-</sup> CD16 <sup>+</sup>                                                                                                                                        |
| Intermediate monocyte    | CD45 <sup>+</sup> CD3 <sup>-</sup> CD19 <sup>-</sup> CD56 <sup>-</sup> HLA-DR <sup>+</sup> CD88 <sup>+</sup> CD14 <sup>+</sup> CD16 <sup>+</sup>                                                                                                                                        |
| cDC1                     | CD45 <sup>+</sup> CD3 <sup>-</sup> CD19 <sup>-</sup> CD56 <sup>-</sup> HLA-DR <sup>+</sup> CD88 <sup>-</sup> CD16 <sup>-</sup> Siglec-6 <sup>-</sup> Axl <sup>-</sup><br>CD11c <sup>+</sup> CD123 <sup>-</sup> CD1c <sup>-</sup> CD141 <sup>+</sup>                                     |
| cDC2                     | CD45 <sup>+</sup> CD3 <sup>-</sup> CD19 <sup>-</sup> CD56 <sup>-</sup> HLA-DR <sup>+</sup> CD88 <sup>-</sup> CD16 <sup>-</sup> Siglec-6 <sup>-</sup> Axl <sup>-</sup><br>CD11c <sup>+</sup> CD123 <sup>-</sup> CD1c <sup>+</sup> CD141 <sup>-</sup> CD5 <sup>+</sup> CD163 <sup>-</sup> |
| DC3                      | CD45 <sup>+</sup> CD3 <sup>-</sup> CD19 <sup>-</sup> CD56 <sup>-</sup> HLA-DR <sup>+</sup> CD88 <sup>-</sup> CD16 <sup>-</sup> Siglec-6 <sup>-</sup> Axl <sup>-</sup><br>CD11c <sup>+</sup> CD123 <sup>-</sup> CD1c <sup>+</sup> CD141 <sup>-</sup> CD5 <sup>-</sup> CD163 <sup>+</sup> |
| CD11c <sup>+</sup> AS-DC | CD45 <sup>+</sup> CD3 <sup>-</sup> CD19 <sup>-</sup> CD56 <sup>-</sup> HLA-DR <sup>+</sup> CD88 <sup>-</sup> Siglec-6 <sup>+</sup> Axl <sup>+</sup> CD11c <sup>+</sup> CD123 <sup>-</sup><br>/lo                                                                                        |
| CD11c <sup>-</sup> AS-DC | CD45 <sup>+</sup> CD3 <sup>-</sup> CD19 <sup>-</sup> CD56 <sup>-</sup> HLA-DR <sup>+</sup> CD88 <sup>-</sup> Siglec-6 <sup>+</sup> Axl <sup>+</sup> CD11c <sup>-</sup> CD123 <sup>+</sup>                                                                                               |
| pDC                      | CD45 <sup>+</sup> CD3 <sup>-</sup> CD19 <sup>-</sup> CD56 <sup>-</sup> HLA-DR <sup>+</sup> CD88 <sup>-</sup> CD16 <sup>-</sup> Siglec-6 <sup>-</sup> Axl <sup>-</sup> CD11c <sup>-</sup><br>CD123 <sup>+</sup>                                                                          |
